# Supplementary material for: Tailoring the Emission Behavior of WO3 Thin Films by Eu3+ Ions for Light-Emitting Applications
Source: MDPI journal article supplement (doi:10.3390/nano13010007), 2022-12-20
Supplement: s1 [file s1]

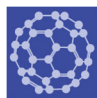

# Tailoring the Emission Behavior of WO<sub>3</sub> Thin Films by Eu<sup>3+</sup>Ions for Light-Emitting Applications

V. S. Kavitha <sup>1,2</sup>, V. Biju <sup>2</sup>, K. G. Gopchandran <sup>1</sup>, R. Praveena <sup>3</sup>, C. K. Jayasankar <sup>4</sup>, Wanichaya Mekprasart <sup>5</sup>, Kanokthip Boonyarattanakalin <sup>5</sup>, Wisanu Pecharapa <sup>5,\*</sup> and V. P. Mahadevan Pillai <sup>1,6,\*</sup>

<sup>1</sup> Department of Optoelectronics, University of Kerala, Kariavattom, Thiruvananthapuram 695581, India

<sup>2</sup> Department of Nanoscience and Nanotechnology, University of Kerala, Kariavattom, Thiruvananthapuram 695581, India

<sup>3</sup> Department of Physics, Gayatri Vidhya Parishad College of Engineering (A), Visakhapatnam 530048, India

<sup>4</sup> Department of Physics, Sri Venkateswara University, Tirupati 517502, India

<sup>5</sup> College of Materials Innovation and Technology, King Mongkut's Institute of Technology Ladkrabang, Bangkok 10520, Thailand

<sup>6</sup> Amrita School of Physical Science, Amrita Vishwa Vidyapeetam, Amaravathi Campus, Coimbatore 641112, India

\* Correspondence: wisanu.pe@kmitl.ac.th (W.P.); vmpillai9@gmail.com (V.P.M.)

## Supporting Information

$$D_{hkl} = \frac{k\lambda}{\beta_{hkl} \cos \theta_{hkl}} \quad \text{Equation (S1)}$$

where  $k$  is a constant and its value is 0.9 for spherical shape particles.  $\lambda=1.5406 \text{ \AA}$ , is the wavelength of the X-ray radiation (CuK $\alpha$  line) used for recording the diffractograms.  $\beta_{hkl}$  stands for the full width at half maximum intensity (FWHM) of the intense (200) peak and  $\theta_{hkl}$  denote half of the diffraction angle corresponds to intense (200) peak.

$$T \tan \theta_{hkl} = \frac{\lambda}{D_{hkl} \cos \theta_{hkl}} - \beta_{hkl} \quad \text{Equation (S2)}$$

where  $T$  denotes the strain in the films.

$$\delta = \frac{1}{D^2} \quad \text{-Equation (S3)}$$

where  $\delta$  denotes the dislocation density.

$$\alpha(h\nu) = A(h\nu - E_g)^n \quad \text{Equation (S4)}$$

where 'A' is a constant called the band edge constant and is associated with the band tailing.  $h\nu$  corresponds to the energy of the incident photon and 'n' determines the nature of electronic transition.
